# Supplementary material for: Evaluating tropospheric humidity from GPS radio occultation, radiosonde, and AIRS from high-resolution time series
Source: Copernicus journal article supplement (doi:10.5194/amt-2017-486), 2018-01-25
Supplement: Supplementary file 1 [file amt-2017-486-supplement.pdf]

# Supplement: Evaluating tropospheric humidity from GPS radio occultation, radiosonde, and AIRS from high-resolution time series

Therese Rieckh<sup>1,2</sup>, Richard Anthes<sup>1</sup>, William Randel<sup>3</sup>, Shu-Peng Ho<sup>1</sup>, and Ulrich Foelsche<sup>4,2</sup>

<sup>1</sup>COSMIC Program Office, University Corporation for Atmospheric Research, Boulder, Colorado, USA

<sup>2</sup>Wegener Center for Climate and Global Change, University of Graz, Graz, Austria

<sup>3</sup>National Center for Atmospheric Research, Boulder, Colorado, USA

<sup>4</sup>Institute for Geophysics, Astrophysics, and Meteorology/Institute of Physics, University of Graz, Austria

*Correspondence to:* Therese Rieckh (rieckh@ucar.edu)

## 1 Co-Location of ERA, RO, RS, and AIRS

A map with the locations of the 4 chosen RS stations is shown in Fig. S1. Details about the co-location process are depicted in Fig. S2.

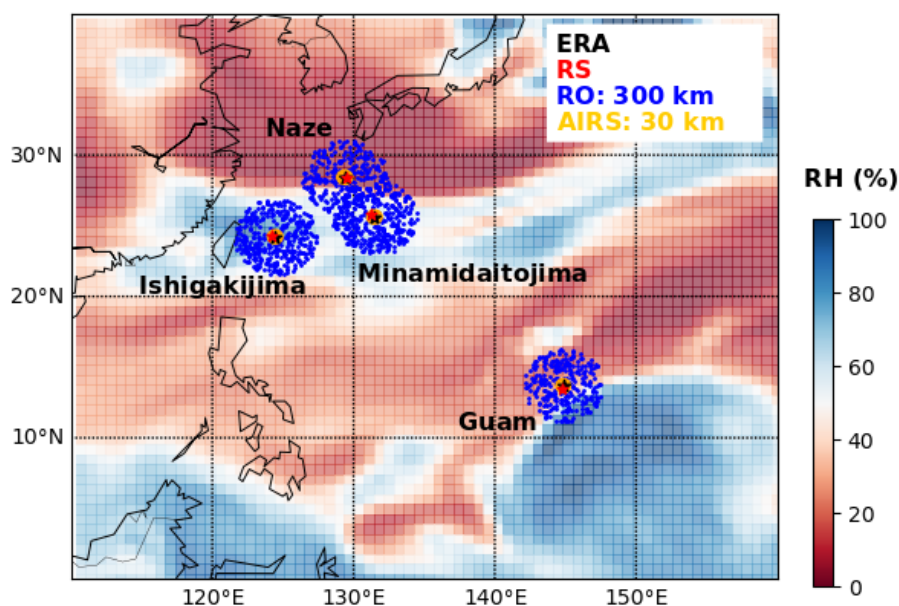

**Figure S1.** Map with the locations of Guam, Ishigakijima, Minamidaitojima, and Naze, and the locations of the data sets: ERA (black star), radiosonde (red star), RO (blue dots), and AIRS (yellow circle). The ERA relative humidity field at 700 hPa for one day is shown in the background.

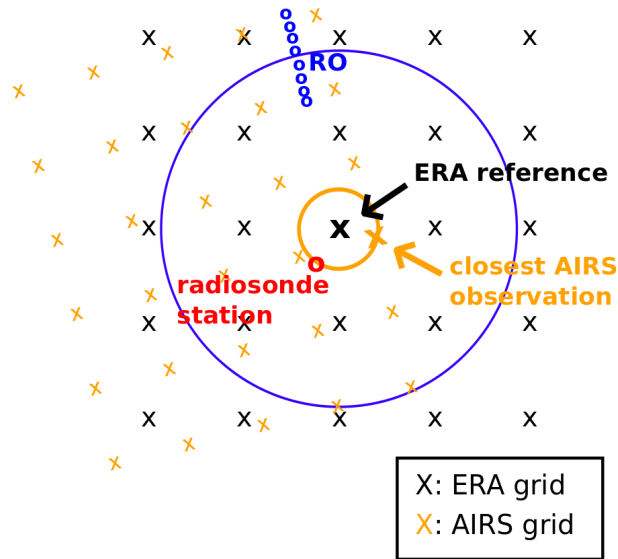

**Figure S2.** Sketch of the co-location of RO, RS, and AIRS with the ERA reference point for one point in time. ROs are chosen if their mean tangent point is within 300 km from the ERA reference.

## 2 2007 annual mean profiles

The constant value CLIMO (ERA 2007 annual mean) is used to normalize all data sets. The values for CLIMO are listed in Table S1.

## 3 Setting the stage: ERA 2007 time series of $N$ , $T$ , $q$ , and RH

- 5 Time series for ERA refractivity, temperature, specific humidity, and relative humidity for 2007 are shown in Fig. S3 for Guam and in Fig. S4 for Ishigakijima. All data are interpolated to a common 25 hPa grid.

## 4 Normalized difference for specific humidity between various data sets and ERA

The Minamidaitojima 2007 RH time series are shown in Fig. S5 (top). Time series for  $q$  normalized differences between various data sets and ERA are shown in Fig. S5 (panels 2–5) and Fig. S6.

## 10 5 Normalized difference for refractivity between various data sets and ERA

Time series for refractivity  $N$  normalized differences between various data sets and ERA are shown in Fig. S7 and Fig. S8.

**Table S1.** Mean annual values for refractivity, specific humidity, relative humidity, and temperature for ERA in 2007, interpolated on a 25 hPa grid.

| Pressure<br>(hPa) | Refractivity (N-units) |       |       |       | Specific Humidity ( $\text{g kg}^{-1}$ ) |      |      |      | Relative Humidity (%) |      |      |      | Temperature ( $^{\circ}\text{C}$ ) |       |       |       |
|-------------------|------------------------|-------|-------|-------|------------------------------------------|------|------|------|-----------------------|------|------|------|------------------------------------|-------|-------|-------|
|                   | Guam                   | Ishi  | Mina  | Naze  | Guam                                     | Ishi | Mina | Naze | Guam                  | Ishi | Mina | Naze | Guam                               | Ishi  | Mina  | Naze  |
| 300               | 96.7                   | 96.8  | 97.0  | 97.5  | 0.3                                      | 0.3  | 0.3  | 0.3  | 41.6                  | 37.8 | 38.8 | 40.3 | -29.8                              | -30.3 | -30.9 | -32.1 |
| 325               | 103.1                  | 103.3 | 103.5 | 104.1 | 0.4                                      | 0.4  | 0.4  | 0.4  | 39.1                  | 37.6 | 38.3 | 40.7 | -25.6                              | -26.5 | -27.0 | -28.5 |
| 350               | 109.8                  | 110.3 | 110.4 | 111.2 | 0.6                                      | 0.6  | 0.5  | 0.5  | 36.6                  | 37.5 | 37.7 | 41.2 | -21.5                              | -22.6 | -23.2 | -24.9 |
| 375               | 116.4                  | 117.1 | 117.1 | 117.9 | 0.7                                      | 0.7  | 0.7  | 0.6  | 35.6                  | 37.7 | 37.5 | 40.9 | -18.1                              | -19.5 | -20.1 | -21.8 |
| 400               | 123.5                  | 124.3 | 124.3 | 125.1 | 0.9                                      | 0.9  | 0.9  | 0.8  | 34.5                  | 37.9 | 37.3 | 40.6 | -14.8                              | -16.4 | -16.9 | -18.7 |
| 425               | 130.4                  | 131.3 | 131.1 | 132.0 | 1.1                                      | 1.1  | 1.0  | 1.0  | 35.0                  | 38.3 | 37.1 | 40.6 | -12.0                              | -13.7 | -14.2 | -16.0 |
| 450               | 137.7                  | 138.7 | 138.4 | 139.3 | 1.4                                      | 1.4  | 1.3  | 1.2  | 35.5                  | 38.7 | 37.0 | 40.6 | -9.3                               | -11.0 | -11.5 | -13.3 |
| 475               | 145.0                  | 146.0 | 145.6 | 146.4 | 1.7                                      | 1.7  | 1.5  | 1.5  | 36.9                  | 39.7 | 37.9 | 41.3 | -6.9                               | -8.6  | -9.1  | -10.8 |
| 500               | 152.8                  | 153.7 | 153.2 | 154.0 | 2.0                                      | 2.0  | 1.8  | 1.7  | 38.3                  | 40.8 | 38.9 | 42.0 | -4.4                               | -6.3  | -6.6  | -8.4  |
| 525               | 160.4                  | 161.4 | 160.8 | 161.4 | 2.3                                      | 2.3  | 2.1  | 2.0  | 39.7                  | 42.4 | 40.7 | 43.0 | -2.4                               | -4.2  | -4.5  | -6.3  |
| 550               | 168.4                  | 169.5 | 168.9 | 169.3 | 2.7                                      | 2.7  | 2.5  | 2.3  | 41.1                  | 44.0 | 42.4 | 43.9 | -0.3                               | -2.1  | -2.4  | -4.2  |
| 575               | 176.4                  | 177.7 | 176.9 | 177.1 | 3.0                                      | 3.1  | 2.9  | 2.6  | 42.8                  | 46.1 | 44.4 | 45.3 | 1.5                                | -0.2  | -0.6  | -2.4  |
| 600               | 184.7                  | 186.3 | 185.4 | 185.4 | 3.5                                      | 3.6  | 3.3  | 3.0  | 44.6                  | 48.2 | 46.3 | 46.8 | 3.4                                | 1.7   | 1.3   | -0.6  |
| 625               | 193.1                  | 195.0 | 193.8 | 193.5 | 3.9                                      | 4.0  | 3.7  | 3.4  | 45.8                  | 50.2 | 48.1 | 48.2 | 5.3                                | 3.4   | 3.1   | 1.1   |
| 650               | 202.0                  | 204.1 | 202.7 | 202.0 | 4.5                                      | 4.6  | 4.2  | 3.8  | 47.1                  | 52.3 | 49.9 | 49.6 | 7.3                                | 5.1   | 4.8   | 2.8   |
| 675               | 211.2                  | 213.3 | 211.5 | 210.3 | 5.0                                      | 5.1  | 4.7  | 4.1  | 48.7                  | 54.6 | 51.6 | 50.7 | 9.0                                | 6.7   | 6.3   | 4.3   |
| 700               | 220.8                  | 222.9 | 220.8 | 219.0 | 5.7                                      | 5.7  | 5.2  | 4.6  | 50.4                  | 56.9 | 53.3 | 51.8 | 10.7                               | 8.2   | 7.8   | 5.8   |
| 725               | 231.1                  | 232.4 | 229.9 | 227.5 | 6.3                                      | 6.2  | 5.6  | 4.9  | 53.1                  | 59.0 | 55.0 | 52.6 | 12.1                               | 9.5   | 9.1   | 7.0   |
| 750               | 241.8                  | 242.3 | 239.5 | 236.3 | 7.1                                      | 6.8  | 6.2  | 5.3  | 55.9                  | 61.1 | 56.6 | 53.5 | 13.6                               | 10.8  | 10.3  | 8.3   |
| 775               | 253.9                  | 252.4 | 249.5 | 245.3 | 8.1                                      | 7.3  | 6.7  | 5.7  | 60.1                  | 63.4 | 59.3 | 54.9 | 14.8                               | 12.0  | 11.4  | 9.4   |
| 800               | 267.1                  | 263.0 | 260.3 | 254.9 | 9.2                                      | 8.0  | 7.4  | 6.2  | 65.4                  | 66.3 | 63.0 | 56.9 | 15.9                               | 13.1  | 12.4  | 10.5  |
| 825               | 281.5                  | 274.7 | 271.9 | 265.7 | 10.4                                     | 8.7  | 8.2  | 6.8  | 71.5                  | 70.5 | 67.4 | 61.3 | 16.9                               | 14.0  | 13.4  | 11.5  |
| 850               | 295.9                  | 287.0 | 283.8 | 277.7 | 11.6                                     | 9.6  | 8.9  | 7.6  | 76.6                  | 74.7 | 71.5 | 66.9 | 17.9                               | 15.1  | 14.3  | 12.4  |
| 875               | 310.2                  | 299.6 | 295.8 | 290.2 | 12.8                                     | 10.5 | 9.7  | 8.5  | 80.5                  | 78.1 | 75.0 | 72.5 | 19.1                               | 16.1  | 15.4  | 13.5  |
| 900               | 324.2                  | 312.5 | 308.4 | 303.3 | 13.9                                     | 11.4 | 10.6 | 9.5  | 83.2                  | 81.1 | 78.3 | 77.6 | 20.4                               | 17.3  | 16.5  | 14.6  |
| 925               | 337.6                  | 325.4 | 321.5 | 316.1 | 14.9                                     | 12.4 | 11.6 | 10.4 | 84.2                  | 83.0 | 80.9 | 80.5 | 21.8                               | 18.6  | 17.8  | 16.0  |
| 950               | 352.0                  | 338.2 | 334.5 | 328.2 | 16.0                                     | 13.3 | 12.5 | 11.2 | 86.6                  | 83.7 | 82.5 | 81.1 | 22.9                               | 20.0  | 19.1  | 17.4  |
| 975               | 363.4                  | 349.7 | 346.1 | 338.9 | 16.7                                     | 14.0 | 13.3 | 11.9 | 84.3                  | 81.8 | 81.2 | 79.1 | 24.6                               | 21.6  | 20.7  | 19.1  |
| 1000              | 371.6                  | 358.8 | 354.5 | 347.3 | 17.1                                     | 14.5 | 13.7 | 12.3 | 78.0                  | 76.7 | 75.8 | 74.1 | 26.6                               | 23.6  | 22.7  | 21.1  |

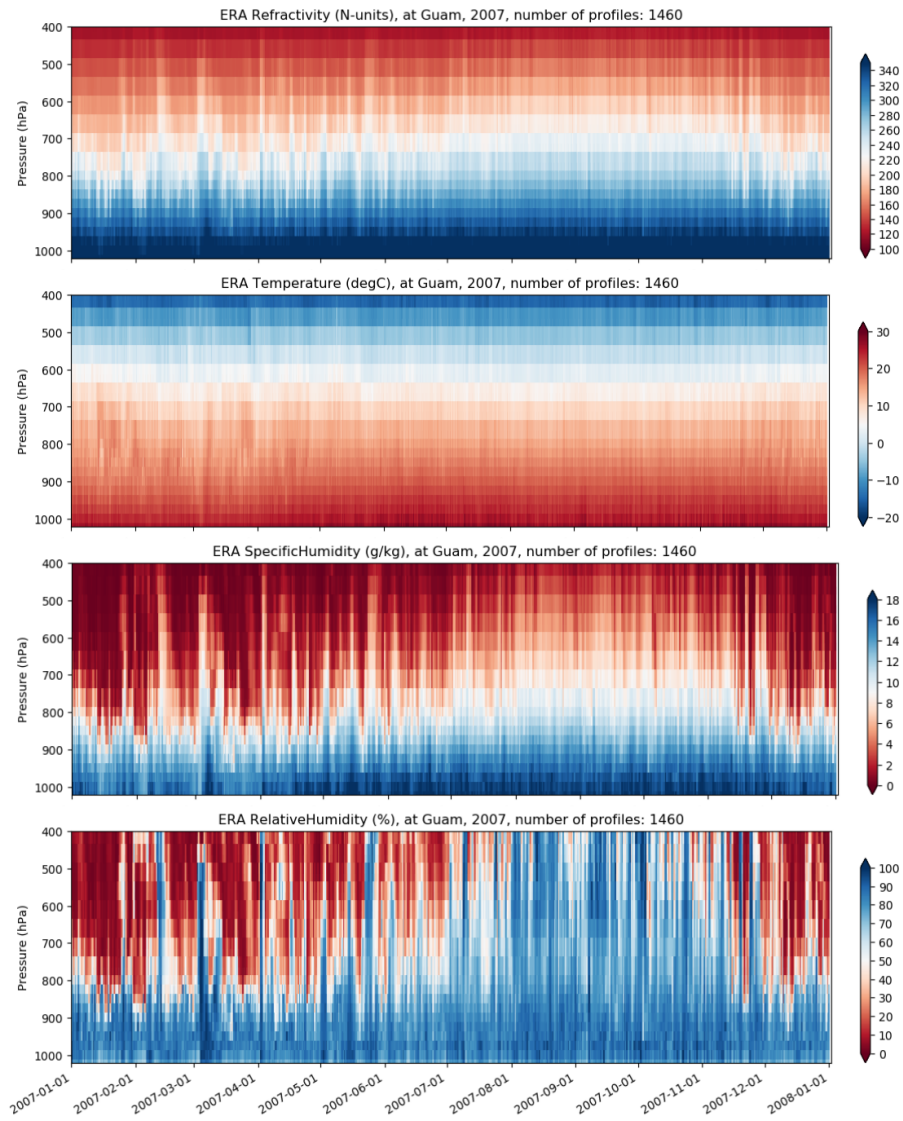

**Figure S3.** ERA 2007 time series at Guam for refractivity, temperature, specific humidity, and relative humidity (top to bottom).

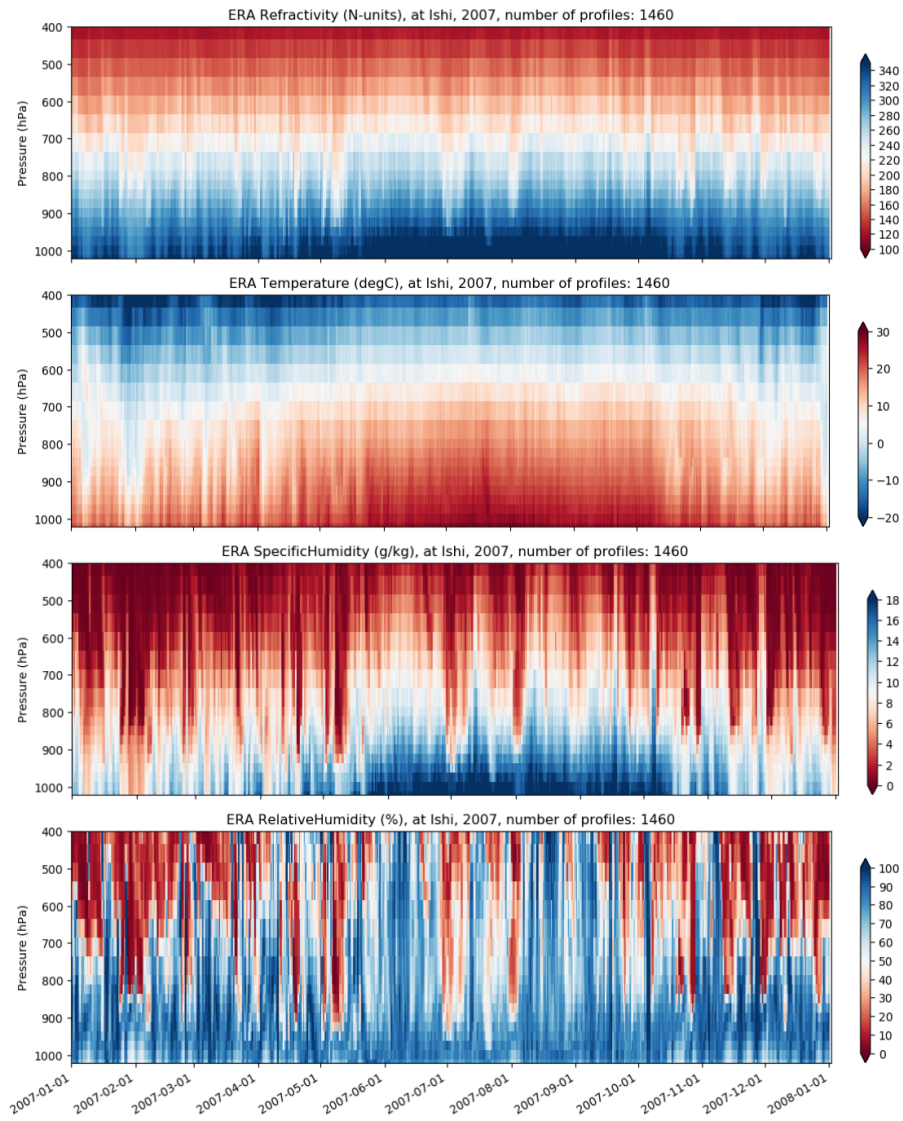

**Figure S4.** ERA 2007 time series at Ishigakijima for refractivity, temperature, specific humidity, and relative humidity (top to bottom).

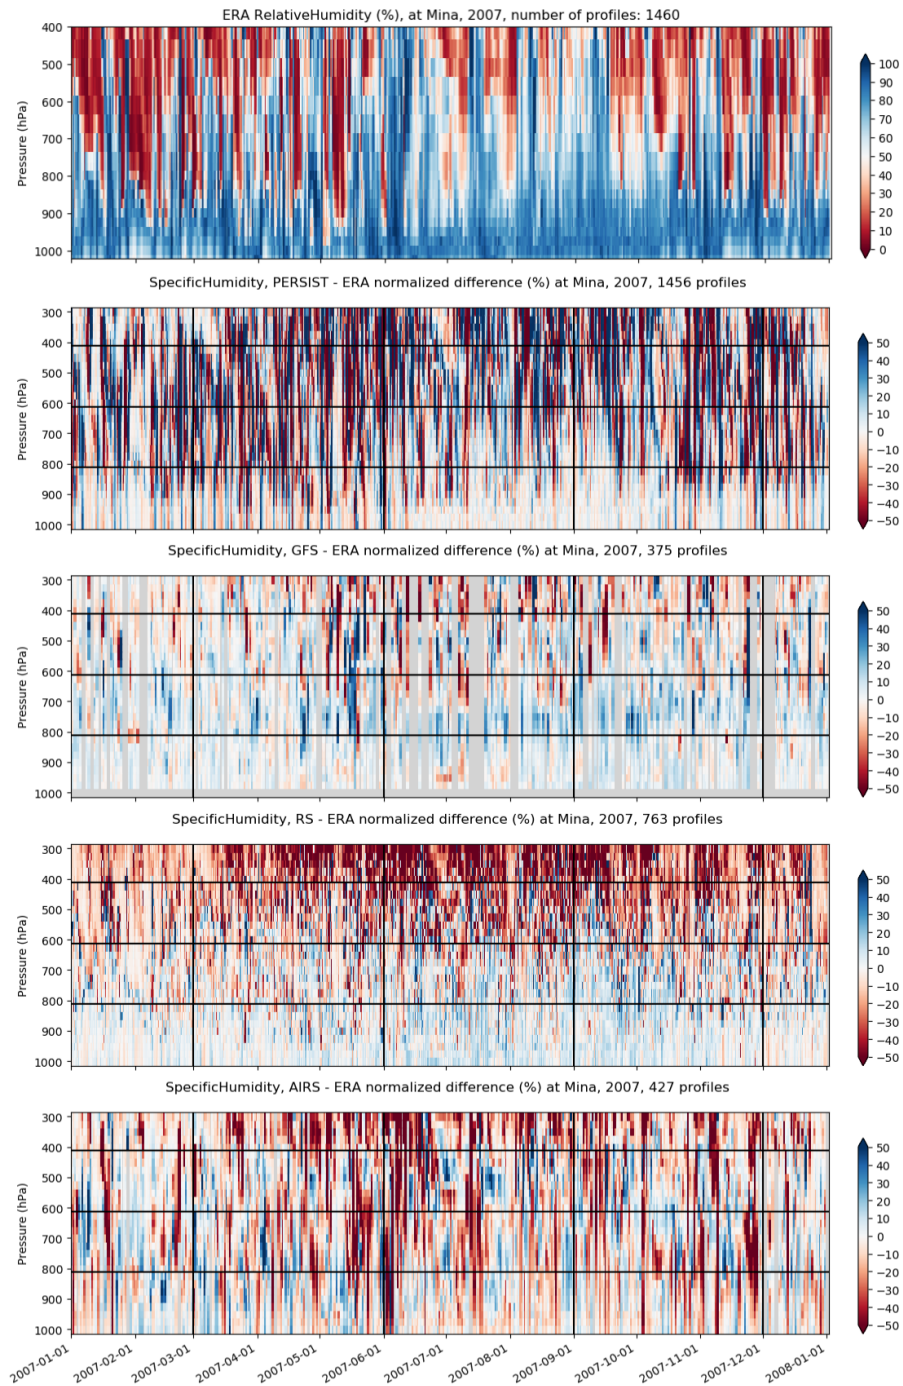

**Figure S5.** Top panel: 2007 time series of the relative humidity (%) at Minamidaitojima over 2007 with blue representing moist air and red representing dry air. Other panels: Normalized difference of specific humidity for PERSIST, GFS, RS, and AIRS compared to ERA at Minamidaitojima, 2007.

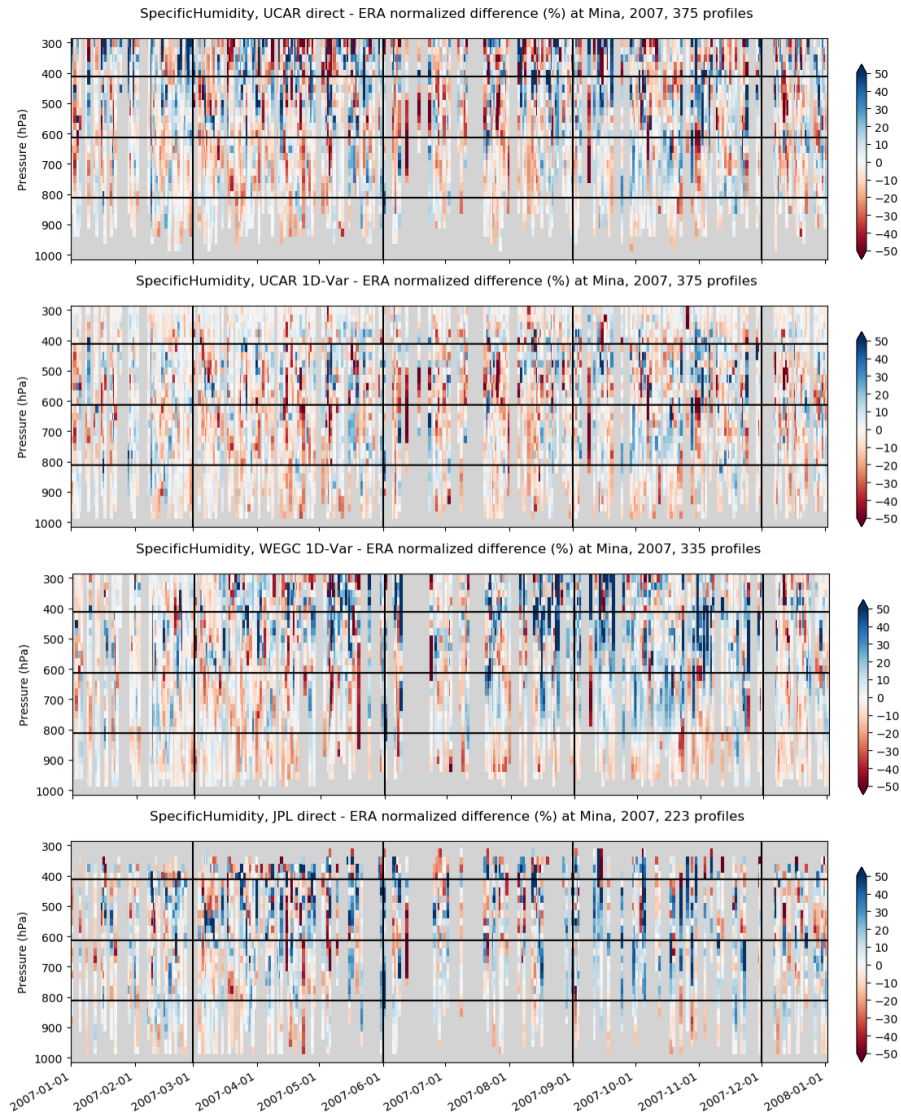

**Figure S6.** Normalized difference of specific humidity for the RO retrievals UCAR direct, UCAR 1D-Var, WEGC 1D-Var, and JPL direct compared to ERA at Minamidaitojima, 2007.

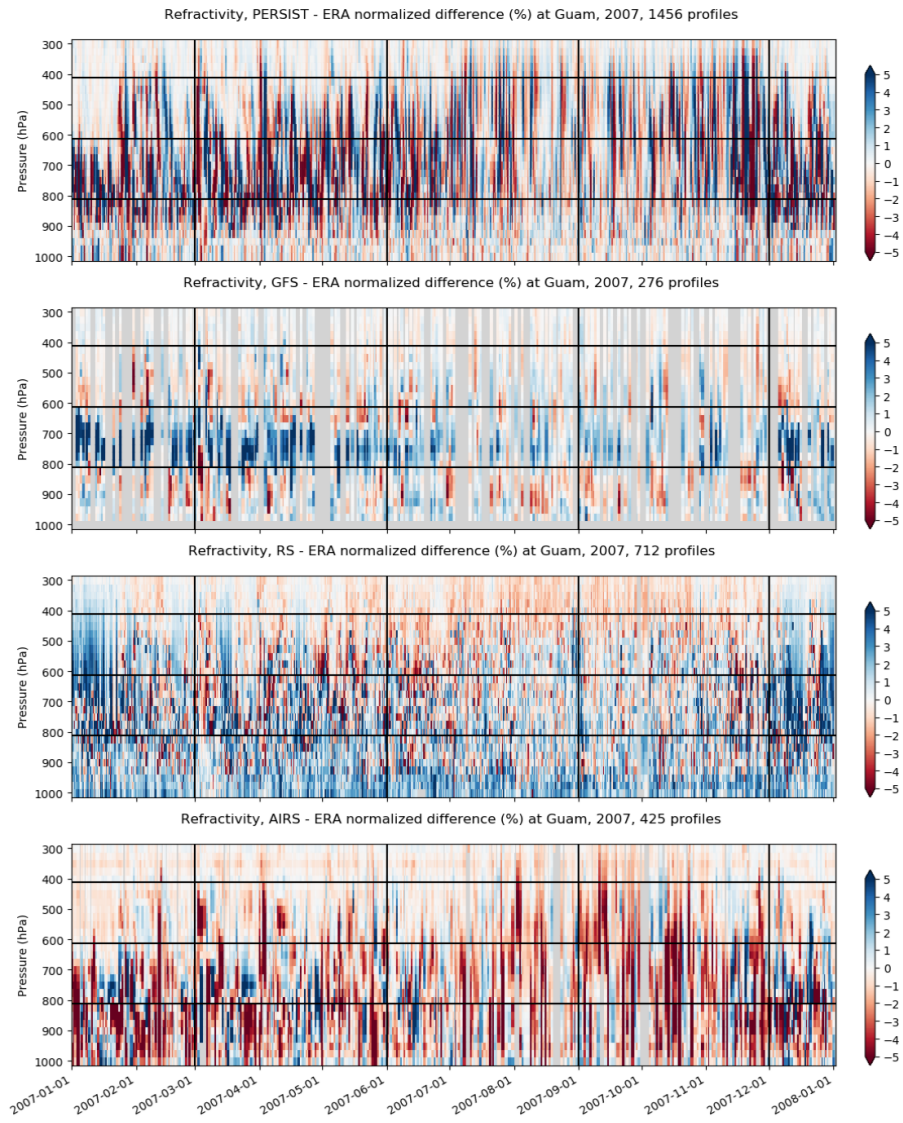

**Figure S7.** Normalized difference for refractivity for PERSIST, GFS, RS, and AIRS compared to ERA at Guam, 2007.



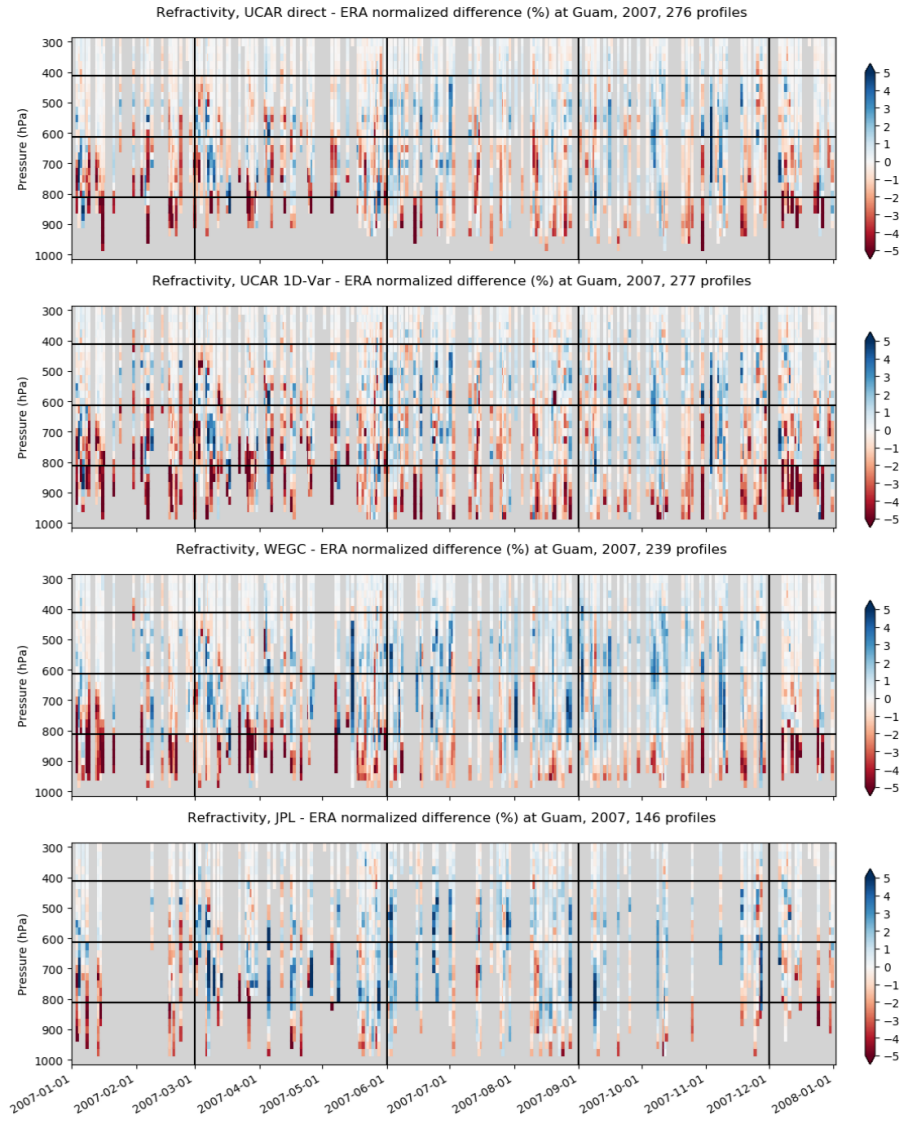

**Figure S8.** Normalized difference for refractivity for the RO retrievals UCAR direct, UCAR 1D-Var, WEGC 1D-Var, and JPL direct compared to ERA at Guam, 2007.
